# Supplementary material
Source: Copernicus journal article supplement (doi:10.5194/essd-18-3729-2026)
Supplement: Supplementary file 1 [file essd-18-3729-2026-supplement.pdf]

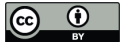

*Supplement of*

## **TephAta – an online collection of tephra data from the Atacama Desert**

**Niklas Leicher et al.**

*Correspondence to:* Niklas Leicher (n.leicher@uni-koeln.de)

The copyright of individual parts of the supplement might differ from the article licence.

## Supplementary Material

The input masks to document tephra related data in seven different categories (Site, Sample, Physical Properties, Geochemistry, Chronology, Chronostratigraphy, Tephra Correlation Group) within the TephAta database are displayed below in Fig. S1-S8. A list of all input fields and their brief description is given in Table S1. A list of all dropdown options is given in Table S2.

**Fig. S1: Input Mask “Site”**

The image shows a web-based input form for the 'Site' category. At the top, there are seven tabs: 'Conditions', 'Site', 'Sample', 'Physical Properties', 'Geochemistry', 'Chronology', 'Chronostratigraphy', and 'Tephra Correlation Group'. The 'Site' tab is active. Below the tabs, the form contains the following fields:

- Site:** A dropdown menu with the placeholder text 'Select a site'.
- Site Name:** A text input field with the placeholder text 'Enter site name'.
- Site Description:** A text area for entering a description.
- Site Location:** Two text input fields for 'Latitude' and 'Longitude'.
- Site Classification:** Two dropdown menus: 'Geolocation type' (placeholder: 'Select geolocation type') and 'Site type' (placeholder: 'Select site type').
- Site Spatial Context:** A text area for additional context.
- Section Thickness:** A text input field and a dropdown menu for 'Select unit'.
- Additional Site Comments:** A text area for extra comments.
- Additional Metadata File:** A file search input field with the placeholder text 'Durchsuchen...' and 'Keine Datei ausgewählt.', and a 'Clear' button.

Each field has a red warning icon (a circle with an exclamation mark) and a blue information icon (a circle with an 'i'). At the bottom of the form, there are three buttons: '« Previous', 'Submit', and 'Next »'.

Fig. S2: Input Mask “Sample”

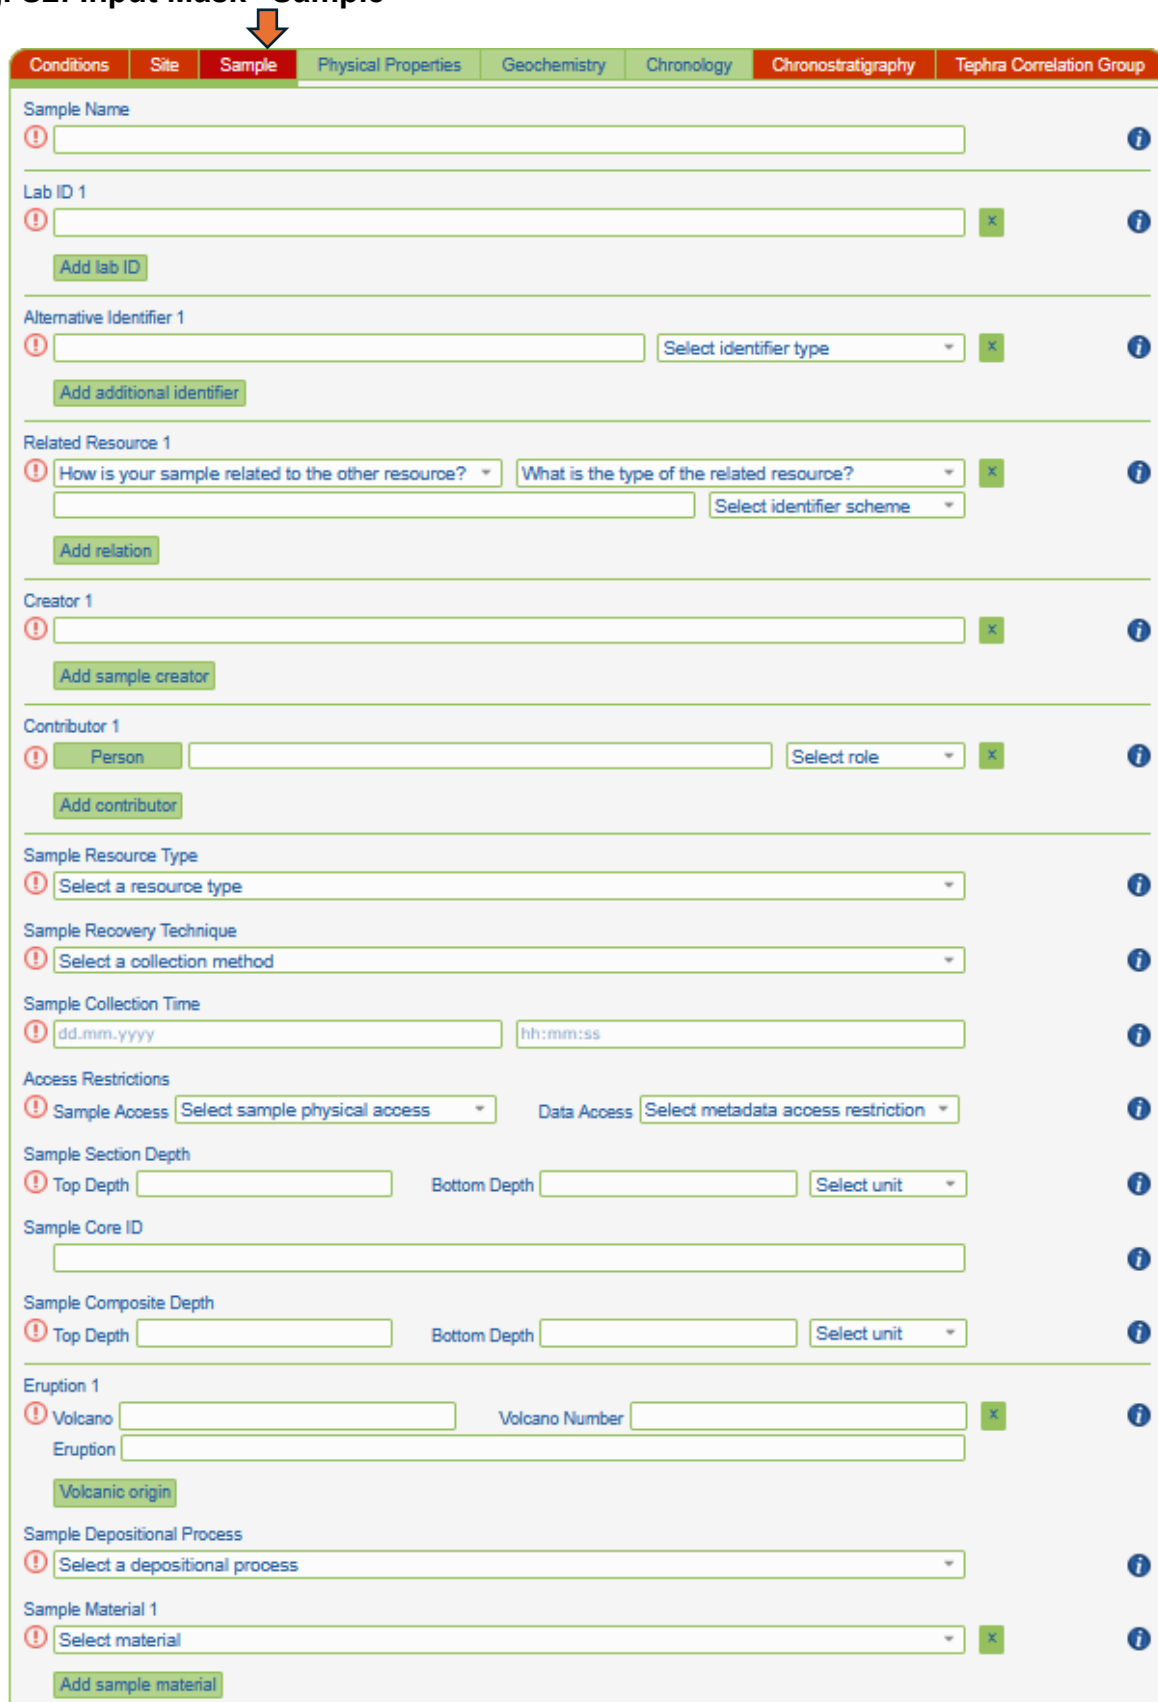

The image shows a web-based input mask for a 'Sample' record. At the top, there is a navigation bar with tabs: 'Conditions', 'Site', 'Sample', 'Physical Properties', 'Geochemistry', 'Chronology', 'Chronostratigraphy', and 'Tephra Correlation Group'. An orange arrow points to the 'Sample' tab. The form is organized into several sections, each with a title, a red information icon, a blue help icon, and a green 'x' icon. Each section contains one or more input fields, dropdown menus, or buttons.

- Sample Name:** A text input field.
- Lab ID 1:** A text input field with an 'Add lab ID' button below it.
- Alternative Identifier 1:** A text input field, a 'Select identifier type' dropdown, and an 'Add additional identifier' button.
- Related Resource 1:** Two dropdown menus: 'How is your sample related to the other resource?' and 'What is the type of the related resource?'. Below them is a text input field and a 'Select identifier scheme' dropdown, with an 'Add relation' button.
- Creator 1:** A text input field with an 'Add sample creator' button.
- Contributor 1:** A dropdown menu with 'Person' selected, a text input field, a 'Select role' dropdown, and an 'Add contributor' button.
- Sample Resource Type:** A dropdown menu with 'Select a resource type'.
- Sample Recovery Technique:** A dropdown menu with 'Select a collection method'.
- Sample Collection Time:** Two text input fields: 'dd.mm.yyyy' and 'hh:mm:ss'.
- Access Restrictions:** Two dropdown menus: 'Sample Access' with 'Select sample physical access' and 'Data Access' with 'Select metadata access restriction'.
- Sample Section Depth:** Two text input fields: 'Top Depth' and 'Bottom Depth', and a 'Select unit' dropdown.
- Sample Core ID:** A text input field.
- Sample Composite Depth:** Two text input fields: 'Top Depth' and 'Bottom Depth', and a 'Select unit' dropdown.
- Eruption 1:** Two text input fields: 'Volcano' and 'Volcano Number', and a third text input field labeled 'Eruption'. Below them is a 'Volcanic origin' button.
- Sample Depositional Process:** A dropdown menu with 'Select a depositional process'.
- Sample Material 1:** A dropdown menu with 'Select material' and an 'Add sample material' button.

**Fig. S3: Input Mask “Sample” *continued***

|                                       |                                                                                                          |  |
|---------------------------------------|----------------------------------------------------------------------------------------------------------|--|
| Sample Method                         | <input type="text" value="Select sample method"/>                                                        |  |
| Number of (Sub-)samples               | <input type="text"/>                                                                                     |  |
| Subsample Information                 | <input type="text"/>                                                                                     |  |
| Sample Lab Split Amount               | <input type="text"/>                                                                                     |  |
| Sample Lab Split Information          | <input type="text"/>                                                                                     |  |
| Major/Minor Element Analysis Method 1 | <input type="text" value="Select major/minor element analysis method"/>                                  |  |
|                                       | <input type="button" value="Add major/minor analysis method"/>                                           |  |
| Trace Element Analysis Method 1       | <input type="text" value="Select trace element analysis method"/>                                        |  |
|                                       | <input type="button" value="Add trace element analysis method"/>                                         |  |
| Isotope Analysis Method 1             | <input type="text" value="Select isotope analysis method"/>                                              |  |
|                                       | <input type="button" value="Add isotope analysis method"/>                                               |  |
| Sample Dating Method 1                | <input type="text" value="Select sample dating method"/>                                                 |  |
|                                       | <input type="button" value="Add sample dating method"/>                                                  |  |
| Additional comments                   | <input type="text"/>                                                                                     |  |
| Additional Metadata File              | <input type="text" value="Durchsuchen... Keine Datei ausgewählt."/> <input type="button" value="Clear"/> |  |

Fig. S4: Input Mask “Physical Properties”

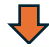

| Conditions                                                                                                                                                     | Site | Sample                                | Physical Properties | Geochemistry | Chronology | Chronostratigraphy                    | Tephra Correlation Group |
|----------------------------------------------------------------------------------------------------------------------------------------------------------------|------|---------------------------------------|---------------------|--------------|------------|---------------------------------------|--------------------------|
| Physical Properties 1 <span>✕</span>                                                                                                                           |      |                                       |                     |              |            |                                       |                          |
| <b>Physical Layer Properties</b>                                                                                                                               |      |                                       |                     |              |            |                                       |                          |
| ! Layer Continuity <input type="text"/> <span>i</span>                                                                                                         |      |                                       |                     |              |            |                                       |                          |
| Min. Thickness <input type="text"/> Unit <input type="text"/> Max. Thickness <input type="text"/> Unit <input type="text"/> <span>i</span>                     |      |                                       |                     |              |            |                                       |                          |
| Color <input type="text"/> <span>i</span>                                                                                                                      |      |                                       |                     |              |            |                                       |                          |
| <input type="button" value="Add Top Contact"/>                                                                                                                 |      |                                       |                     |              |            |                                       |                          |
| <input type="button" value="Add Bottom Contact"/>                                                                                                              |      |                                       |                     |              |            |                                       |                          |
| Host Sediment Mixing <input type="radio"/> Yes <input type="radio"/> No <span>i</span>                                                                         |      |                                       |                     |              |            |                                       |                          |
| Reworking <input type="radio"/> Yes <input type="radio"/> No <span>i</span>                                                                                    |      |                                       |                     |              |            |                                       |                          |
| Grain Size <input type="text"/> <span>i</span>                                                                                                                 |      |                                       |                     |              |            |                                       |                          |
| <input type="button" value="Add Internal Bedding"/>                                                                                                            |      |                                       |                     |              |            |                                       |                          |
| <input type="button" value="Add Internal Sorting"/>                                                                                                            |      |                                       |                     |              |            |                                       |                          |
| <input type="button" value="Add Internal Grading"/>                                                                                                            |      |                                       |                     |              |            |                                       |                          |
| Field Alteration <input type="text"/> <span>i</span>                                                                                                           |      |                                       |                     |              |            |                                       |                          |
| Components <input type="text"/> <span>i</span>                                                                                                                 |      |                                       |                     |              |            |                                       |                          |
| Layer Comments <input type="text"/> <span>i</span>                                                                                                             |      |                                       |                     |              |            |                                       |                          |
| <b>Physical Microanalytical Properties</b>                                                                                                                     |      |                                       |                     |              |            |                                       |                          |
| Lab ID <input type="text"/> <span>i</span>                                                                                                                     |      |                                       |                     |              |            |                                       |                          |
| Microscoped Fraction <input type="text"/> <span>i</span>                                                                                                       |      |                                       |                     |              |            |                                       |                          |
| <input type="button" value="Add Glass Fragment Type"/>                                                                                                         |      |                                       |                     |              |            |                                       |                          |
| <input type="button" value="Add Glass Shard Morphology"/>                                                                                                      |      |                                       |                     |              |            |                                       |                          |
| Vesicle Proportion <input type="text"/> <span>i</span>                                                                                                         |      |                                       |                     |              |            |                                       |                          |
| <input type="button" value="Add Vesicle Shape"/>                                                                                                               |      |                                       |                     |              |            |                                       |                          |
| <input type="button" value="Add Microscopic Shard Alteration"/>                                                                                                |      |                                       |                     |              |            |                                       |                          |
| Mineral Assemblage <input type="text"/> <span>i</span>                                                                                                         |      |                                       |                     |              |            |                                       |                          |
| Lithics/Host Sediment <input type="text"/> <span>i</span>                                                                                                      |      |                                       |                     |              |            |                                       |                          |
| Light Microscope Images <input type="radio"/> Yes <input type="radio"/> No <span>i</span>                                                                      |      |                                       |                     |              |            |                                       |                          |
| BSE Images <input type="radio"/> Yes <input type="radio"/> No <span>i</span>                                                                                   |      |                                       |                     |              |            |                                       |                          |
| Additional Microscope Comment <input type="text"/> <span>i</span>                                                                                              |      |                                       |                     |              |            |                                       |                          |
| Additional File <input type="text"/> <input type="button" value="Durchsuchen..."/> Keine Datei ausgewählt. <input type="button" value="Clear"/> <span>i</span> |      |                                       |                     |              |            |                                       |                          |
| <input type="button" value="Add Physical Properties"/>                                                                                                         |      |                                       |                     |              |            |                                       |                          |
| <input type="button" value="« Previous"/>                                                                                                                      |      | <input type="button" value="Submit"/> |                     |              |            | <input type="button" value="Next »"/> |                          |

Fig. S5: Input Mask “Geochemistry”

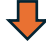

Conditions Site Sample Physical Properties **Geochemistry** Chronology Chronostratigraphy Tephra Correlation Group

TAS Classification 1  
Select TAS classification

---

WDS-EDS Template File  
Durchsuchen... Keine Datei ausgewählt.

Raw WDS-EDS File  
Durchsuchen... Keine Datei ausgewählt.

---

LA-ICP-MS Template File  
Durchsuchen... Keine Datei ausgewählt.

Raw LA-ICP-MS File  
Durchsuchen... Keine Datei ausgewählt.

---

87Sr/86Sr Analysis 1  
Lab ID  Method     
Lab   
Ratio  Ratio error  Initial ratio

---

143Nd/144Nd Analysis 1  
Lab ID  Method     
Lab   
Ratio  Ratio error  Initial ratio

---

176Hf/177Hf Analysis 1  
Lab ID  Method     
Lab   
Ratio  Ratio error

---

Pb Analysis 1  
Lab ID  Method     
Lab   
206 Ratio  206 Ratio error   
207 Ratio  207 Ratio error   
208 Ratio  208 Ratio error

---

Supplemental Isotope Analysis File  
Durchsuchen... Keine Datei ausgewählt.

« Previous  Next »

Fig. S6: Input Mask “Chronology”

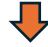

Conditions Site Sample Physical Properties Geochemistry **Chronology** Chronostratigraphy Tephra Correlation Group

Chronological Information 1

! Method  Type

Lab

Min. Age  Max. Age  Age Unit

Best Age  Best Age Uncertainty

Age Calculation

Uncertainty Type

Xenocryst Presence  Yes  No  N/A Xenocryst Mean Age

Additional Chronological File  Keine Datei ausgewählt.

Use this age as the sample's best age.

« Previous  Next »

Fig. S7: Input Mask “Chronostratigraphy”

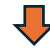

Conditions Site Sample Physical Properties Geochemistry **Chronology** **Chronostratigraphy** Tephra Correlation Group

Erathem

!

System

!

Series

!

Stage

!

Marine Isotope Stage

Age Range

! Min. Age  Max. Age  Age Unit

Regional Stratigraphic Unit

Unit  Abbreviation

« Previous  Next »

Fig. S8: Input Mask “Tephra Correlation Group”

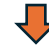

Conditions Site Sample Physical Properties Geochemistry Chronology Chronostratigraphy Tephra Correlation Group

Tephra Correlation Group

! Select a Tephra Correlation Group *i*

Name of Tephra Correlation Group *i*

Best Age of Tephra Correlation Group

! Best Age  Uncertainty  Select unit *i*

Dating Details

! Mineral Phase  Dating Method  *i*

Volcano

Volcano  Volcano Number  *i*

Eruption  *i*

« Previous Submit Next »

**Table S1**

The following table contains all input fields within the TephAta database, organized by their respective categories. For each field, the field name is provided along with its field type, which specifies how the data is entered (e.g., via a dropdown selection or text input). Additionally, a brief description explains the type of information to be entered for each field.

| Category | Input Field              | Field Type         | Description                                                                          |
|----------|--------------------------|--------------------|--------------------------------------------------------------------------------------|
| Site     | Site                     | dropdown selection | selection of an existing sample location or creation of a new location               |
| Site     | Site Name                | text               | name of sampling site                                                                |
| Site     | Site Description         | text               | general description of site                                                          |
| Site     | Site Location Latitude   | number             | latitude position of site in decimal degree and WGS84 datum                          |
| Site     | Site Location Longitude  | number             | longitudinal position of site in decimal degree and WGS84 datum                      |
| Site     | Geolocation Type         | dropdown selection | type of physical feature the sample was collected from e.g., alluvial fan or roadcut |
| Site     | Site Type                | dropdown selection | type of sample site, e.g. natural or artificial outcrop                              |
| Site     | Site Spatial Context     | text               | description of spatial context of site e.g. slope and its angle, flat source, etc.   |
| Site     | Section Thickness        | number             | thickness of site e.g. thickness of outcrop or core                                  |
| Site     | Section Thickness unit   | dropdown selection | unit of the section thickness                                                        |
| Site     | Additional comments      | short text         | additional comments for site description, e.g. site equivalent to site in reference  |
| Site     | Additional Metadata File | zip-file upload    | upload function for additional files, e.g. sketch of the outcrop, images             |

| Category | Input Field                      | Field Type                   | Description                                                                                                |
|----------|----------------------------------|------------------------------|------------------------------------------------------------------------------------------------------------|
| Sample   | Sample Name                      | text                         | name of sample                                                                                             |
| Sample   | Lab ID(s)                        | text                         | sample identifier(s) used in lab                                                                           |
| Sample   | Alternative identifier(s)        | text                         | alternative existing identifier related to the sample, such as DOI, IGSN etc.                              |
| Sample   | Alternative identifier type      | dropdown selection           | type of additional identifier (DOI, URL, IGSN, etc.)                                                       |
| Sample   | Related Resource Relation        | dropdown selection           | How is your sample related to the other resource? (e.g. is cited by, is part of, is variant form of, etc.) |
| Sample   | Related Resource Type            | dropdown selection           | What is the type of the related resource? (e.g. data paper, dataset, image, etc.)                          |
| Sample   | Related Resource                 | text                         | name of related resource                                                                                   |
| Sample   | Related Resource identifier type | dropdown selection           | type of Related Resource type identifier (DOI, URL, IGSN)                                                  |
| Sample   | Creator                          | text, learning dropdown list | name of sample creator                                                                                     |
| Sample   | Contributor                      | text, learning dropdown list | name of contributor                                                                                        |
| Sample   | Contributor Role                 | dropdown selection           | role of contributor, e.g. researcher                                                                       |
| Sample   | Sample Resource Type             | dropdown selection           | type of sample                                                                                             |
| Sample   | Sample Recovery Technique        | dropdown selection           | technique applied to recover the sample (e.g. coring)                                                      |
| Sample   | Sample Collection Time           | dropdown calendar            | date the sample was taken                                                                                  |
| Sample   | Sample Collection Time           | text                         | time the sample was taken                                                                                  |
| Sample   | Sample Access                    | dropdown selection           | accessibility of sample material                                                                           |
| Sample   | Data Access                      | dropdown selection           | accessibility of sample related data                                                                       |
| Sample   | Sample Section Depth Top         | number                       | top depth of sample within the sampled section                                                             |
| Sample   | Sample Section Depth Bottom      | number                       | bottom depth of sample within the sampled section                                                          |
| Sample   | Sample Section Depth Unit        | dropdown selection           | unit of section depth                                                                                      |
| Sample   | Sample Core ID                   | text                         | name or ID of the core section                                                                             |
| Sample   | Sample Composite Depth Top       | number                       | top depth of sample within the sampled core section                                                        |
| Sample   | Sample Composite Depth Bottom    | number                       | bottom depth of sample within the sampled core section                                                     |
| Sample   | Sample Composite Depth Unit      | dropdown selection           | unit of core section depth                                                                                 |

| Category | Input Field                            | Field Type                   | Description                                                                                  |
|----------|----------------------------------------|------------------------------|----------------------------------------------------------------------------------------------|
| Sample   | Volcanic Origin Volcano                | text, learning dropdown list | name of the source volcano                                                                   |
| Sample   | Volcanic Origin Volcano Number         | text, learning dropdown list | unique identifier documented in the Volcanoes of the World database                          |
| Sample   | Volcanic Origin Eruption               | text, learning dropdown list | name of the source eruption                                                                  |
| Sample   | Sample Depositional Process            | dropdown selection           | depositional process of sample within section                                                |
| Sample   | Sample Material(s)                     | dropdown selection           | type of material sampled, multiple entries possible                                          |
| Sample   | Sample Method                          | dropdown selection           | position of the sample from within a stratigraphic layer                                     |
| Sample   | Number of (Sub-)samples                | number                       | number of samples taken in the field                                                         |
| Sample   | Subsample Information                  | text                         | additional information about subsamples taken, e.g. from which interval the sample was taken |
| Sample   | Sample Lab Split Amount                | text                         | number of lab splits made from the original sample material                                  |
| Sample   | Sample Lab Split Information           | text                         | description of splits made in the lab, e.g. processing                                       |
| Sample   | Major/Minor Element Analysis Method(s) | dropdown selection           | methods and material used for major and minor element analyses                               |
| Sample   | Trace Element Analysis Method(s)       | dropdown selection           | methods and material used for trace element analyses                                         |
| Sample   | Isotope Analysis Method(s)             | dropdown selection           | methods and material used for isotope analyses                                               |
| Sample   | Sample Dating Method(s)                | dropdown selection           | methods and material used for dating                                                         |
| Sample   | Additional comments                    | text                         | field for additional information describing the sample                                       |
| Sample   | Additional Metadata File               | zip file upload              | upload function for additional files describing the sample (e.g. photos, field notes).       |

| Category            | Input Field                    | Field Type                   | Description                                                                                |
|---------------------|--------------------------------|------------------------------|--------------------------------------------------------------------------------------------|
| Physical Properties | Layer Continuity               | text                         | physical continuity of the stratigraphic layer                                             |
| Physical Properties | Minimum Thickness              | number                       | minimum thickness of stratigraphic layer                                                   |
| Physical Properties | Maximum Thickness              | number                       | maximum thickness of stratigraphic layer                                                   |
| Physical Properties | Thickness Unit                 | dropdown selection           | unit of thickness of stratigraphic layer                                                   |
| Physical Properties | Color                          | text                         | color of stratigraphic layer                                                               |
| Physical Properties | Top Contact                    | text, learning dropdown list | type of top contact of stratigraphic layer with host sediment                              |
| Physical Properties | Bottom Contact                 | text, learning dropdown list | type of bottom contact of stratigraphic layer with host sediment                           |
| Physical Properties | Host Sediment Mixing           | selection yes/no             | mixing of stratigraphic layer with host sediment                                           |
| Physical Properties | Reworking                      | selection yes/no             | evidence of reworking for stratigraphic layer                                              |
| Physical Properties | Grain Size                     | text                         | grain size description of the stratigraphic layer                                          |
| Physical Properties | Internal Bedding               | text, learning dropdown list | description of internal bedding                                                            |
| Physical Properties | Internal Sorting               | text, learning dropdown list | description of internal sorting                                                            |
| Physical Properties | Internal Grading               | text, learning dropdown list | description of internal grading                                                            |
| Physical Properties | Field Alteration               | text                         | description of alterations observed in the field                                           |
| Physical Properties | Components                     | text                         | description of components of the stratigraphic layer                                       |
| Physical Properties | Layer Comments                 | text                         | additional observations made for the stratigraphic layer                                   |
| Physical Properties | Lab ID                         | text                         | lab ID of sample used for microscopic inspection                                           |
| Physical Properties | Microscoped Fraction           | text                         | fraction inspected under the microscope                                                    |
| Physical Properties | Glass Fragment Type            | text, learning dropdown list | type of glass fragments observed during microscopic inspection                             |
| Physical Properties | Glass Shard Morphology         | text, learning dropdown list | morphology of glass fragments observed during microscopic inspection                       |
| Physical Properties | Vesicle Proportion             | text                         | amount of vesicles observed within the glass fragments during microscopic inspection       |
| Physical Properties | Vesicle Shape                  | text, learning dropdown list | shape of vesicles observed within glass fragments during microscopic inspection            |
| Physical Properties | Microscopic Shard Alteration   | text, learning dropdown list | description of glass fragment alteration                                                   |
| Physical Properties | Mineral Assemblage             | text                         | description of mineral assemblage observed during microscopic inspection                   |
| Physical Properties | Lithics/Host Sediment          | text                         | description of lithics or host rock observed during microscopic inspection                 |
| Physical Properties | Light Microscope Images        | selection yes/no             | light microscope images available                                                          |
| Physical Properties | BSE images                     | selection yes/no             | backscattered electron images available                                                    |
| Physical Properties | Additional Microscope Comments | text                         | additional observations made for the stratigraphic layer during microscope inspection      |
| Physical Properties | Additional File                | zip file upload              | upload function for additional files for morphological description, e.g. microscope images |

| Category     | Input Field                        | Field Type         | Description                                                                           |
|--------------|------------------------------------|--------------------|---------------------------------------------------------------------------------------|
| Geochemistry | TAS classification(s)              | dropdown selection | total alkali vs. silica (TAS) classification of the sample                            |
| Geochemistry | WDS-EDS Template File              | template upload    | upload function for specific template containing major and minor element compositions |
| Geochemistry | Raw WDS-EDS File                   | zip file upload    | upload function for raw unprocessed major and minor element data                      |
| Geochemistry | LA-ICP-MS Template File            | template upload    | upload function for specific template containing trace element compositions           |
| Geochemistry | Raw LA-ICP-MS File                 | zip file upload    | upload function for raw unprocessed trace element data                                |
| Geochemistry | 87Sr/86Sr Analysis Lab ID          | text               | lab ID of Sr isotope sample                                                           |
| Geochemistry | 87Sr/86Sr Analysis Method          | dropdown selection | methods and material used for Sr-isotope analyses                                     |
| Geochemistry | 87Sr/86Sr Lab                      | text               | name of institute/lab analyses performed                                              |
| Geochemistry | 87Sr/86Sr Ratio                    | number             | Ratio of 87Sr/86Sr                                                                    |
| Geochemistry | 87Sr/86Sr Error                    | number             | 2 sigma uncertainty of 87Sr/86Sr                                                      |
| Geochemistry | 87Sr/86Sr Initial ratio            | number             | Initial 87Sr/86Sr ratio                                                               |
| Geochemistry | 143Nd/144Nd Analysis Lab ID        | text               | Lab ID of Nd isotope sample                                                           |
| Geochemistry | 143Nd/144Nd Analysis Method        | dropdown selection | methods and material used for Nd-isotope analyses                                     |
| Geochemistry | 143Nd/144Nd Lab                    | text               | name of institute/lab analyses performed                                              |
| Geochemistry | 143Nd/144Nd Ratio                  | number             | Ratio of 143Nd/144Nd                                                                  |
| Geochemistry | 143Nd/144Nd Error                  | number             | 2 sigma uncertainty of 143Nd/144Nd                                                    |
| Geochemistry | 143Nd/144Nd Initial ratio          | number             | Initial 143Nd/144Nd ratio                                                             |
| Geochemistry | 176Hf/177Hf Analysis Lab ID        | text               | Lab ID of Hf isotope-sample                                                           |
| Geochemistry | 176Hf/177Hf Analysis Method        | dropdown selection | methods and material used for Hf-isotope analyses                                     |
| Geochemistry | 176Hf/177Hf Lab                    | text               | name of institute/lab analyses performed                                              |
| Geochemistry | 176Hf/177Hf Ratio                  | number             | Ratio of 176Hf/177Hf                                                                  |
| Geochemistry | 176Hf/177Hf Error                  | number             | 2 sigma uncertainty of 176Hf/177Hf                                                    |
| Geochemistry | 176Hf/177Hf Initial ratio          | number             | Initial 176Hf/177Hf ratio                                                             |
| Geochemistry | Pb Analysis Lab ID                 | text               | Lab ID of Pb- isotope-sample                                                          |
| Geochemistry | Pb Analysis Method                 | dropdown selection | methods and material used for Pb-isotope analyses                                     |
| Geochemistry | Pb Lab                             | text               | name of institute/lab analyses performed                                              |
| Geochemistry | 206Pb/204Pb Ratio                  | number             | Ratio of 206Pb/204Pb                                                                  |
| Geochemistry | 206Pb/204Pb error                  | number             | 2 sigma uncertainty of 206Pb/204Pb                                                    |
| Geochemistry | 207Pb/204Pb Ratio                  | number             | Ratio of 207Pb/204Pb                                                                  |
| Geochemistry | 207Pb/204Pb error                  | number             | 2 sigma uncertainty of 207Pb/204Pb                                                    |
| Geochemistry | 208Pb/204Pb Ratio                  | number             | Ratio of 208Pb/204Pb                                                                  |
| Geochemistry | 208Pb/204Pb error                  | number             | 2 sigma uncertainty of 208Pb/204Pb                                                    |
| Geochemistry | Supplemental Isotope Analysis File | zip file upload    | upload function for additional files of isotope analyses, e.g. raw data               |

| Category   | Input Field                       | Field Type         | Description                                                                   |
|------------|-----------------------------------|--------------------|-------------------------------------------------------------------------------|
| Chronology | Method                            | dropdown selection | dating method and mineral phase used                                          |
| Chronology | Type                              | dropdown selection | type of age, e.g. single crystal fusing or stepwise heating                   |
| Chronology | Lab                               | text               | name of laboratory/institute analyses performed                               |
| Chronology | Minimum Age                       | number             | youngest age of the sample obtained by this method                            |
| Chronology | Maximum Age                       | number             | oldest age of the sample obtained by this method                              |
| Chronology | Unit Ages                         | dropdown selection | unit of age                                                                   |
| Chronology | Best Age                          | number             | final age calculated for the sample by this method                            |
| Chronology | Best Age Uncertainty              | number             | uncertainty calculated for the final age                                      |
| Chronology | Age Calculation                   | text               | method used to calculate the best age, e.g. weighted mean                     |
| Chronology | Uncertainty Type                  | text               | level and type of uncertainty calculation                                     |
| Chronology | Xenocryst Contamination           | selection          | xenocrysts content of the sample                                              |
| Chronology | Xenocryst Mean Age                | number             | mean age of xenocrysts                                                        |
| Chronology | Additional Chronological File     | zip file upload    | upload function for additional files related to dating results, e.g. raw data |
| Chronology | Use this as the sample's best age | selection          | option to select the best age, if multiple ages exist for the sample          |

| Category           | Input Field                 | Field Type         | Description                                              |
|--------------------|-----------------------------|--------------------|----------------------------------------------------------|
| Chronostratigraphy | Erathem                     | dropdown selection | Erathem the sample was deposited                         |
| Chronostratigraphy | System                      | dropdown selection | System the sample was deposited                          |
| Chronostratigraphy | Series                      | dropdown selection | Series the sample was deposited                          |
| Chronostratigraphy | Stage                       | dropdown selection | Stage the sample was deposited                           |
| Chronostratigraphy | Marine Isotope Stage        | dropdown selection | Marine Isotope Stage the sample was deposited            |
| Chronostratigraphy | Age Range Min. Age          | number             | minimum age of sample                                    |
| Chronostratigraphy | Age Range Max. Age          | number             | maximum age of sample                                    |
| Chronostratigraphy | Age Range Age Unit          | dropdown selection | unit of age range                                        |
| Chronostratigraphy | Regional Stratigraphic Unit | text               | name of regional stratigraphic unit the sample was taken |
| Chronostratigraphy | Abbreviation                | text               | abbreviation of the regional stratigraphic unit          |

| Category                 | Input Field                      | Field Type         | Description                                                             |
|--------------------------|----------------------------------|--------------------|-------------------------------------------------------------------------|
| Tephra Correlation Group | Tephra Correlations Group        | dropdown selection | selection of an tephra correlation group or creation of a new one       |
| Tephra Correlation Group | Name of Tephra Correlation Group | text               | name of tephra correlation group                                        |
| Tephra Correlation Group | Best Age                         | number             | most reliable age for the group of correlated tephra                    |
| Tephra Correlation Group | Uncertainty                      | number             | uncertainty of the most reliable age for the group of correlated tephra |
| Tephra Correlation Group | Unit Ages                        | dropdown selection | selection of unit of age and uncertainty                                |
| Tephra Correlation Group | Mineral Phase                    | dropdown selection | mineral phase used for dating of best age                               |
| Tephra Correlation Group | Dating Method                    | dropdown selection | method used for dating of best age                                      |
| Tephra Correlation Group | Volcano                          | text               | name of the source volcano                                              |
| Tephra Correlation Group | Volcano Number                   | number             | unique identifier documented in the Volcanoes of the World database     |
| Tephra Correlation Group | Eruption                         | text               | name of the source eruption                                             |

**Table S2:**

The table contains all dropdown options within the TephAta database, organized by their respective categories and input fields.

| Category | Input Field            | Dropdown Options                                                                                                                                                                                                                                                                                                                                                                                                                                                                                                                                                                                                                                                               |
|----------|------------------------|--------------------------------------------------------------------------------------------------------------------------------------------------------------------------------------------------------------------------------------------------------------------------------------------------------------------------------------------------------------------------------------------------------------------------------------------------------------------------------------------------------------------------------------------------------------------------------------------------------------------------------------------------------------------------------|
| Site     | Site                   | growing list of sites registered within TephAta                                                                                                                                                                                                                                                                                                                                                                                                                                                                                                                                                                                                                                |
| Site     | Geolocation Type       | alluvial fan, anticline, aquifer, arch (natural formation), arroyo, badlands, bank (hydrographic), bar (physiographic), basin, bay, beach, bight, canyon, cape, cavi cliff, continental divide, continental margin, crater, delta, drainage basin, drumlin, dune, earthquake feature, estuary, fault, fault zone, flat, floodplain, fold (ge zone, gap, gulf, gut, hydrothermal vent, ice mass, isthmus, karst area, lake, lava field, ledge, massif, mesa, mineral deposit area, moraine, mountain, mountain summit, ocean trench, outcrop, plain, plateau, playa, reef, ridge, rift zone, roadcut, seamount, sea, stream, submarine canyon, syncline, thermal feature, valle |
| Site     | Site Type              | natural outcrop, artificial outcrop, drill site, trench, surface, other                                                                                                                                                                                                                                                                                                                                                                                                                                                                                                                                                                                                        |
| Site     | Section Thickness unit | m, dm, cm, mm, none                                                                                                                                                                                                                                                                                                                                                                                                                                                                                                                                                                                                                                                            |

| Category | Input Field                            | Dropdown Options                                                                                                                                                                                                                                                                                                                                                                                                                                                                                                                |
|----------|----------------------------------------|---------------------------------------------------------------------------------------------------------------------------------------------------------------------------------------------------------------------------------------------------------------------------------------------------------------------------------------------------------------------------------------------------------------------------------------------------------------------------------------------------------------------------------|
| Sample   | Alternative identifier type            | DOI, Handle, LSID, URL, URN, IGSN                                                                                                                                                                                                                                                                                                                                                                                                                                                                                               |
| Sample   | Related Resource Relation              | is cited by, is part of, has part, is referenced by, references, is documented by, documents, is compiled by, compiles, is variant form of, is original form of, has c                                                                                                                                                                                                                                                                                                                                                          |
| Sample   | Related Resource Type                  | collection, data paper, dataset, event, image, interactive resource, moving image, other, physical object, service, software, sound, text , workflow                                                                                                                                                                                                                                                                                                                                                                            |
| Sample   | Related Resource identifier type       | DOI, Handle, LSID, URL, URN, IGSN                                                                                                                                                                                                                                                                                                                                                                                                                                                                                               |
| Sample   | Contributor Role                       | contact person, distributor, editor, funder, hosting institution, other, project leader, project manager, project member, related person, research group, rights sponsor, supervisor, work package leader                                                                                                                                                                                                                                                                                                                       |
| Sample   | Sample Resource Type                   | Automated, Core , Core Half Round , Core Piece , Core Quarter Round, Core Section , Core Section Half, Core Sub-Piece , Core Whole Round , Cuttings , Core ca Foliage Digestion, Foliage Leaching, Forest floor digestion, Grab, Individual Sample, Oriented Core, Precipitation Bulk, Rock Powder, Standard Reference Specir Section, Thin Section, Unknown                                                                                                                                                                    |
| Sample   | Sample Recovery Technique              | Blasting, Coring, Dredging, Grab, Manual, Manual>Hammer, Other, Unknown                                                                                                                                                                                                                                                                                                                                                                                                                                                         |
| Sample   | Sample Collection Time                 | Calendar                                                                                                                                                                                                                                                                                                                                                                                                                                                                                                                        |
| Sample   | Sample Access                          | Accessible, Restricted, Private, None                                                                                                                                                                                                                                                                                                                                                                                                                                                                                           |
| Sample   | Data Access                            | D6 only, Project Only, Public                                                                                                                                                                                                                                                                                                                                                                                                                                                                                                   |
| Sample   | Sample Section Depth Unit              | m, dm, cm, mm, none                                                                                                                                                                                                                                                                                                                                                                                                                                                                                                             |
| Sample   | Sample Composite Depth Unit            | m, dm, cm, mm, none                                                                                                                                                                                                                                                                                                                                                                                                                                                                                                             |
| Sample   | Sample Depositional Process            | pyroclastic flow, tephra fall, pyroclastic surge, lahar, hyper-concentrated flow, debris avalanche, redeposited pyroclastic material, other depositional or empla                                                                                                                                                                                                                                                                                                                                                               |
| Sample   | Sample Material(s)                     | Air, Gas, Ice, Liquid (Aqueous), Liquid (Organic), Mineral, Organism, Particulate , Rock, Sediment, Tephra, Tissue, Unknown, Other                                                                                                                                                                                                                                                                                                                                                                                              |
| Sample   | Sample Method                          | channel through entire stratum or layer, channel through selected sub-interval of stratum or layer, hand-picked clasts, measured-area (or mass-per-unit-area-incremental, random sample, unknown                                                                                                                                                                                                                                                                                                                                |
| Sample   | Major/Minor Element Analysis Method(s) | SEM-EDS, glass, SEM-EDS, mineral, EPMA-WDS, glass, EPMA-WDS, mineral, XRF, whole-rock, none                                                                                                                                                                                                                                                                                                                                                                                                                                     |
| Sample   | Trace Element Analysis Method(s)       | LA-ICP-MS, glass, LA-ICP-MS, mineral, XRF, whole-rock, ICP-MS, whole-rock, none                                                                                                                                                                                                                                                                                                                                                                                                                                                 |
| Sample   | Isotope Analysis Method(s)             | LA-MC-ICP-MS, glass, LA-MC-ICP-MS, mineral, MC-ICP-MS, whole-rock, MC-ICP-MS, glass separate, MC-ICP-MS, mineral separate, SIMS, glass, SIMS, mineral, T TIMS, glass separate, TIMS, mineral separate, nanoSIMS, glass, nanoSIMS, mineral, none                                                                                                                                                                                                                                                                                 |
| Sample   | Sample Dating Method(s)                | 40Ar/39Ar, K-feldspar, 40Ar/39Ar, mica, 40Ar/39Ar, sanidine, 40Ar/39Ar, leucite, 40Ar/39Ar, plagioclase, 40Ar/39Ar, amphiboles, 40Ar/39Ar, biotite, 40Ar/39/ 40Ar/39Ar, glass, U-Pb, zircon, U-Pb, titanite, (U-Th)/ He, zircon, (U-Th)/ He, apatite, (U-Th)/ He, titanite, (U-Th)/ He, garnet, fission track, zircon, fission track, i groundmass/whole-rock, K/Ar, mica, K/Ar, K-feldspar, K/Ar, amphibole, 14C, organic remains, 14C, carbonate, OSL, host sediment, ESR, host sediment, age mc paleomagnetic, host sediment |

| Category            | Input Field    | Dropdown Options                                                                    |
|---------------------|----------------|-------------------------------------------------------------------------------------|
| Physical Properties | Thickness Unit | m, dm, cm, mm, none                                                                 |
| Physical Properties | Top Contact    | planar parallel, cross-bedded, sharp, gradational, bioturbated, erosional, reworked |

|                          |                              |                                                                                                                                                                                                                                                                                                                                                                                                                                                                                                                                                                                                                                                                                                                                                                                                                                                                                                                                                                                                                                                             |
|--------------------------|------------------------------|-------------------------------------------------------------------------------------------------------------------------------------------------------------------------------------------------------------------------------------------------------------------------------------------------------------------------------------------------------------------------------------------------------------------------------------------------------------------------------------------------------------------------------------------------------------------------------------------------------------------------------------------------------------------------------------------------------------------------------------------------------------------------------------------------------------------------------------------------------------------------------------------------------------------------------------------------------------------------------------------------------------------------------------------------------------|
| Physical Properties      | Bottom Contact               | planar parallel, cross-bedded, sharp, gradational, bioturbated, erosional, reworked                                                                                                                                                                                                                                                                                                                                                                                                                                                                                                                                                                                                                                                                                                                                                                                                                                                                                                                                                                         |
| Physical Properties      | Internal Bedding             | massive, cross bedded, planar bedded, thin bedded, thick bedded, laminated                                                                                                                                                                                                                                                                                                                                                                                                                                                                                                                                                                                                                                                                                                                                                                                                                                                                                                                                                                                  |
| Physical Properties      | Internal Sorting             | very well sorted, well sorted, poorly sorted, very poorly sorted, unsorted                                                                                                                                                                                                                                                                                                                                                                                                                                                                                                                                                                                                                                                                                                                                                                                                                                                                                                                                                                                  |
| Physical Properties      | Internal Grading             | not graded, reverse, normal, reverse-normal, complex, density grading                                                                                                                                                                                                                                                                                                                                                                                                                                                                                                                                                                                                                                                                                                                                                                                                                                                                                                                                                                                       |
| Physical Properties      | Glass Fragment Type          | glass shards, pumice, scoria                                                                                                                                                                                                                                                                                                                                                                                                                                                                                                                                                                                                                                                                                                                                                                                                                                                                                                                                                                                                                                |
| Physical Properties      | Glass Shard Morphology       | platy (flaky shards), blocky (chunky, thick shards), ribbed, bubble wall (bw), bubble wall junction (bwj), slightly vesicular                                                                                                                                                                                                                                                                                                                                                                                                                                                                                                                                                                                                                                                                                                                                                                                                                                                                                                                               |
| Physical Properties      | Vesicle Shape                | spindles, cylindrical, conical, equant, irregular, round, closed, open                                                                                                                                                                                                                                                                                                                                                                                                                                                                                                                                                                                                                                                                                                                                                                                                                                                                                                                                                                                      |
| Physical Properties      | Microscopic Shard Alteration | surficial, devitrified, pitted, not observed                                                                                                                                                                                                                                                                                                                                                                                                                                                                                                                                                                                                                                                                                                                                                                                                                                                                                                                                                                                                                |
| <b>Category</b>          | <b>Input Field</b>           | <b>Dropdown Options</b>                                                                                                                                                                                                                                                                                                                                                                                                                                                                                                                                                                                                                                                                                                                                                                                                                                                                                                                                                                                                                                     |
| Geochemistry             | TAS classification(s)        | Foidite, Picrite, Basalt, Basaltic Andesite, Andesite, Dacite, Rhyolite, Tephrite, Basanite, Phonotephrite, Tephriphonolite, Phonolite, Trachybasalt, Basaltic Trachyandesite, Trachyte, Trachydacite, not defined yet                                                                                                                                                                                                                                                                                                                                                                                                                                                                                                                                                                                                                                                                                                                                                                                                                                      |
| Geochemistry             | 87Sr/86Sr Analysis Method    | LA-MC-ICP-MS, glass, LA-MC-ICP-MS, mineral, MC-ICP-MS, whole-rock, MC-ICP-MS, glass separate, MC-ICP-MS, mineral separate, SIMS, glass, SIMS, mineral, T TIMS, glass separate, TIMS, mineral separate, nanoSIMS, glass, nanoSIMS, mineral, none                                                                                                                                                                                                                                                                                                                                                                                                                                                                                                                                                                                                                                                                                                                                                                                                             |
| Geochemistry             | 143Nd/144Nd Analysis Method  | LA-MC-ICP-MS, glass, LA-MC-ICP-MS, mineral, MC-ICP-MS, whole-rock, MC-ICP-MS, glass separate, MC-ICP-MS, mineral separate, SIMS, glass, SIMS, mineral, T TIMS, glass separate, TIMS, mineral separate, nanoSIMS, glass, nanoSIMS, mineral, none                                                                                                                                                                                                                                                                                                                                                                                                                                                                                                                                                                                                                                                                                                                                                                                                             |
| Geochemistry             | 176Hf/177Hf Analysis Method  | LA-MC-ICP-MS, glass, LA-MC-ICP-MS, mineral, MC-ICP-MS, whole-rock, MC-ICP-MS, glass separate, MC-ICP-MS, mineral separate, SIMS, glass, SIMS, mineral, T TIMS, glass separate, TIMS, mineral separate, nanoSIMS, glass, nanoSIMS, mineral, none                                                                                                                                                                                                                                                                                                                                                                                                                                                                                                                                                                                                                                                                                                                                                                                                             |
| Geochemistry             | Pb Analysis Method           | LA-MC-ICP-MS, glass, LA-MC-ICP-MS, mineral, MC-ICP-MS, whole-rock, MC-ICP-MS, glass separate, MC-ICP-MS, mineral separate, SIMS, glass, SIMS, mineral, T TIMS, glass separate, TIMS, mineral separate, nanoSIMS, glass, nanoSIMS, mineral, none                                                                                                                                                                                                                                                                                                                                                                                                                                                                                                                                                                                                                                                                                                                                                                                                             |
| <b>Category</b>          | <b>Input Field</b>           | <b>Dropdown Options</b>                                                                                                                                                                                                                                                                                                                                                                                                                                                                                                                                                                                                                                                                                                                                                                                                                                                                                                                                                                                                                                     |
| Chronology               | Method                       | 40Ar/39Ar, K-feldspar, 40Ar/39Ar, mica, 40Ar/39Ar, sanidine, 40Ar/39Ar, leucite, 40Ar/39Ar, plagioclase, 40Ar/39Ar, amphiboles, 40Ar/39Ar, biotite, 40Ar/39Ar/40Ar/39Ar, glass, U-Pb, zircon, U-Pb, titanite, (U-Th)/ He, zircon, (U-Th)/ He, apatite, (U-Th)/ He, garnet, fission track, zircon, fission track, groundmass/whole-rock, K/Ar, mica, K/Ar, K-feldspar, K/Ar, amphibole, 14C, organic remains, 14C, carbonate, OSL, host sediment, ESR, host sediment, age mc paleomagnetic, host sediment                                                                                                                                                                                                                                                                                                                                                                                                                                                                                                                                                    |
| Chronology               | Type                         | single crystal fusion, multi crystal fusion, stepwise heating, solution, not appreciable                                                                                                                                                                                                                                                                                                                                                                                                                                                                                                                                                                                                                                                                                                                                                                                                                                                                                                                                                                    |
| Chronology               | Unit Ages                    | Ma, ka, ka cal BP                                                                                                                                                                                                                                                                                                                                                                                                                                                                                                                                                                                                                                                                                                                                                                                                                                                                                                                                                                                                                                           |
| <b>Category</b>          | <b>Input Field</b>           | <b>Dropdown Options</b>                                                                                                                                                                                                                                                                                                                                                                                                                                                                                                                                                                                                                                                                                                                                                                                                                                                                                                                                                                                                                                     |
| Chronostratigraphy       | Erathem                      | Cenozoic, Mesozoic, Paleozoic, None                                                                                                                                                                                                                                                                                                                                                                                                                                                                                                                                                                                                                                                                                                                                                                                                                                                                                                                                                                                                                         |
| Chronostratigraphy       | System                       | Quaternary, Neogene, Paleogene, Cretaceous, Jurassic, Triassic, Permian, Carboniferous, Devonian, Silurian, Ordovician, Cambrian, None                                                                                                                                                                                                                                                                                                                                                                                                                                                                                                                                                                                                                                                                                                                                                                                                                                                                                                                      |
| Chronostratigraphy       | Series                       | Holocene, Pleistocene, Pliocene, Miocene, Oligocene, Eocene, Paleocene, Upper Cretaceous, Lower Cretaceous, Upper Jurassic, Middle Jurassic, Lower Jurassic, Middle Triassic, Lower Triassic, Lopingian, Guadalupian, Cisuralian, Pennsylvanian, Mississippian, Upper Devonian, Middle Devonian, Lower Devonian, Pridoli, I Llandovery, Upper Ordovician, Middle Ordovician, Lower Ordovician, Furongian, Miaolingian, Series 2, Terreneuvian, None                                                                                                                                                                                                                                                                                                                                                                                                                                                                                                                                                                                                         |
| Chronostratigraphy       | Stage                        | Meghalayan, Northgrippian, Greenlandian, Upper Pleistocene, Chibanian, Calabrian, Gelasian, Piacenzian, Zanclean, Messinian, Tortonian, Serravallian, Langhi Aquitanian, Chattian, Uplian, Priabonian, Bartonian, Lutetian, Ypresian, Thanetian, Selandian, Danian, Maastrichtian, Campanian, Santonian, Coniacian, Turor Albian, Aptian, Barremian, Hauterivian, Valanginian, Berriasian, Tithonian, Kimmeridgian, Oxfordian, Callovian, Bathonian, Bajocian, Aalenian, Toarcian, Plienshtettangian, Rhaetian, Norian, Carnian, Ladinian, Anisian, Olenekian, Induan, Changhsingian, Wuchiapingian, Capitanian, Wordian, Roadian, Kungurian, Artinsk Asselian, Gzhelian, Kasimovian, Bashkirian, Serpukhovian, Viséan, Tournaisian, Famennian, Frasnian, Givetian, Eifelian, Emsian, Pragian, Lochkovian, Pridoli-un Gorstian, Homerian, Sheinwoodian, Telychian, Aeronian, Rhuddanian, Hirnantian, Katian, Sandbian, Darriwilian, Dapingian, Floian, Tremadocian, Stage 10, Jian Guzhangian, Drumian, Wuliuan, Stage 4, Stage 3, Stage 2, Fortunian, None |
| Chronostratigraphy       | Age Range Age Unit           | Ma, ka, ka cal BP                                                                                                                                                                                                                                                                                                                                                                                                                                                                                                                                                                                                                                                                                                                                                                                                                                                                                                                                                                                                                                           |
| Chronostratigraphy       | Marine Isotope Stage         | MIS 1-MIS104, G1-G22, K1, K2, KM1-KM6, M1, M2, MG1-MG12                                                                                                                                                                                                                                                                                                                                                                                                                                                                                                                                                                                                                                                                                                                                                                                                                                                                                                                                                                                                     |
| Tephra Correlation Group | Tephra Correlations Group    | growing list of groups registered within TephAta                                                                                                                                                                                                                                                                                                                                                                                                                                                                                                                                                                                                                                                                                                                                                                                                                                                                                                                                                                                                            |
| Tephra Correlation Group | Unit Ages                    | Ma, ka, ka cal BP                                                                                                                                                                                                                                                                                                                                                                                                                                                                                                                                                                                                                                                                                                                                                                                                                                                                                                                                                                                                                                           |
| Tephra Correlation Group | Mineral Phase                | zircon, glass, K-feldspar, leucite, micas, plagioclase, amphiboles, organic remains, host sediment, titanite, apatite, biotite, muscovite, sanidine, garnet, ground other                                                                                                                                                                                                                                                                                                                                                                                                                                                                                                                                                                                                                                                                                                                                                                                                                                                                                   |
| Tephra Correlation Group | Dating Method                | 40Ar/39Ar, U-Pb, (U-Th)/ He, fission track, K/Ar, 14C, OSL, ESR, paleomagnetic, age model, N/A                                                                                                                                                                                                                                                                                                                                                                                                                                                                                                                                                                                                                                                                                                                                                                                                                                                                                                                                                              |
